# Supplementary material for: Deep blue organic light-emitting devices enabled by bipolar phenanthro[9,10-d]imidazole derivatives
Source: Royal Society of Chemistry journal article supplement (doi:10.1039/c5ra13814k), 2015-01-01
Supplement: c5ra13814k1.pdf [file c5ra13814k1.pdf]

## Supporting Information

### Deep blue organic light-emitting devices enabled by bipolar phenanthro[9,10-d]imidazole derivatives

Shuo Chen,<sup>a</sup> Yukun Wu,<sup>b</sup> Yi Zhao,<sup>\*,b</sup> Daining Fang,<sup>\*,a</sup>

<sup>a</sup> *State Key Laboratory for Turbulence and Compound System, College of Engineering, Peking University, Beijing 100871, P.R. China*

<sup>b</sup> *State Key Laboratory on Integrated Optoelectronics, College of Electronics Science and Engineering, Jilin University, 2699 Qianjin Street, Changchun 130012, P.R. China*

### Index

|            | Content                                                              | Page No. |
|------------|----------------------------------------------------------------------|----------|
| Figure S1  | <sup>1</sup> H NMR spectrum of compound <b>FD4B</b> .                | 1        |
| Figure S2  | <sup>1</sup> H NMR spectrum of compound <b>TD4B</b> .                | 1        |
| Figure S3  | <sup>1</sup> H NMR spectrum of compound <b>PhImBr</b> .              | 2        |
| Figure S4  | <sup>1</sup> H NMR spectrum of compound <b>PhImFD</b> .              | 2        |
| Figure S5  | <sup>13</sup> C NMR spectrum of compound <b>PhImFD</b> .             | 3        |
| Figure S6  | <sup>1</sup> H NMR spectrum of compound <b>PhImTD</b> .              | 3        |
| Figure S7  | <sup>13</sup> C NMR spectrum of compound <b>PhImTD</b> .             | 4        |
| Figure S8  | HR-MS spectrum of compound <b>PhImFD</b> .                           | 5        |
| Figure S9  | HR-MS spectrum of compound <b>PhImTD</b> .                           | 5        |
| Figure S10 | Current density of hole-only and electron-only devices.              | 6        |
| Figure S11 | CIE coordinates of the devices A and B at different luminance.       | 6        |
| Figure S12 | Efficiency versus luminance curves of white OLED devices C and D.    | 7        |
| Figure S13 | Electroluminescence spectra for device C at different voltages.      | 8        |
| Figure S14 | Electroluminescence spectra for device D at different voltages.      | 8        |
| Figure S15 | CIE coordinates of the devices C and D at different luminance.       | 9        |
| Figure S16 | Normalized phosphorescent spectra of <b>PhImFD</b> and <b>PhImTD</b> | 10       |
| Table S1   | Key performance parameters of doped WOLED devices C and D.           | 11       |

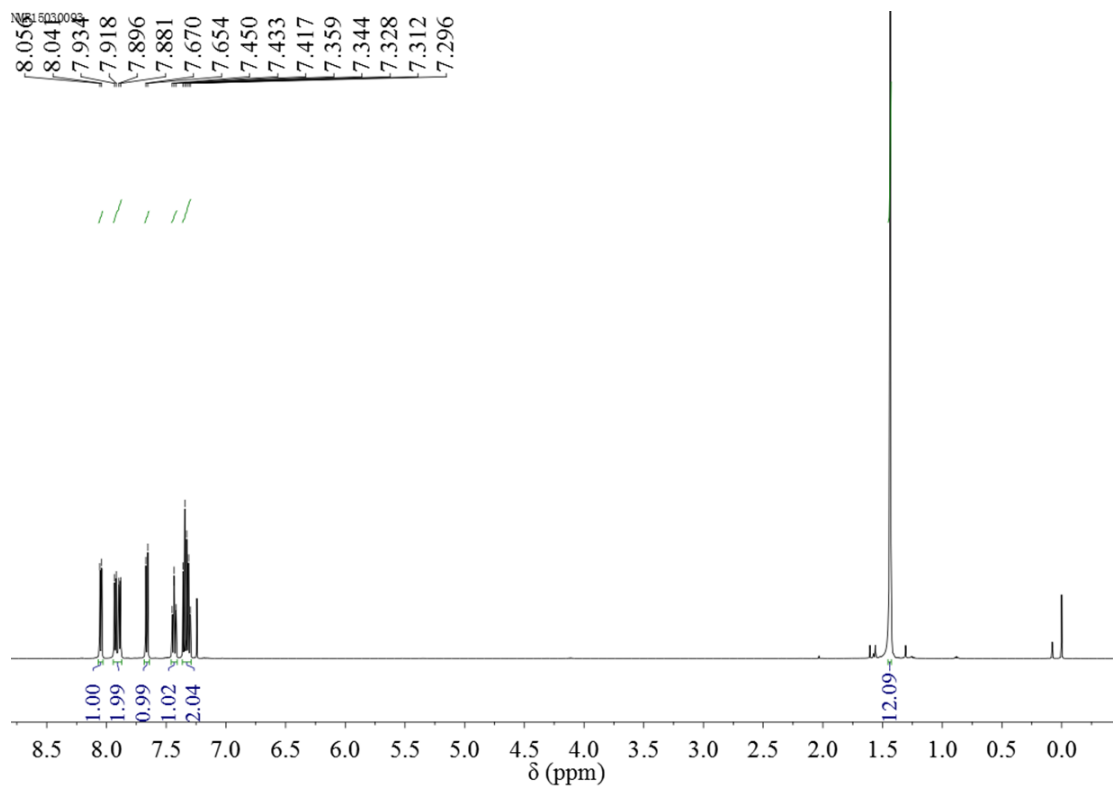

Figure S1. <sup>1</sup>H NMR spectrum of compound **FD4B**.

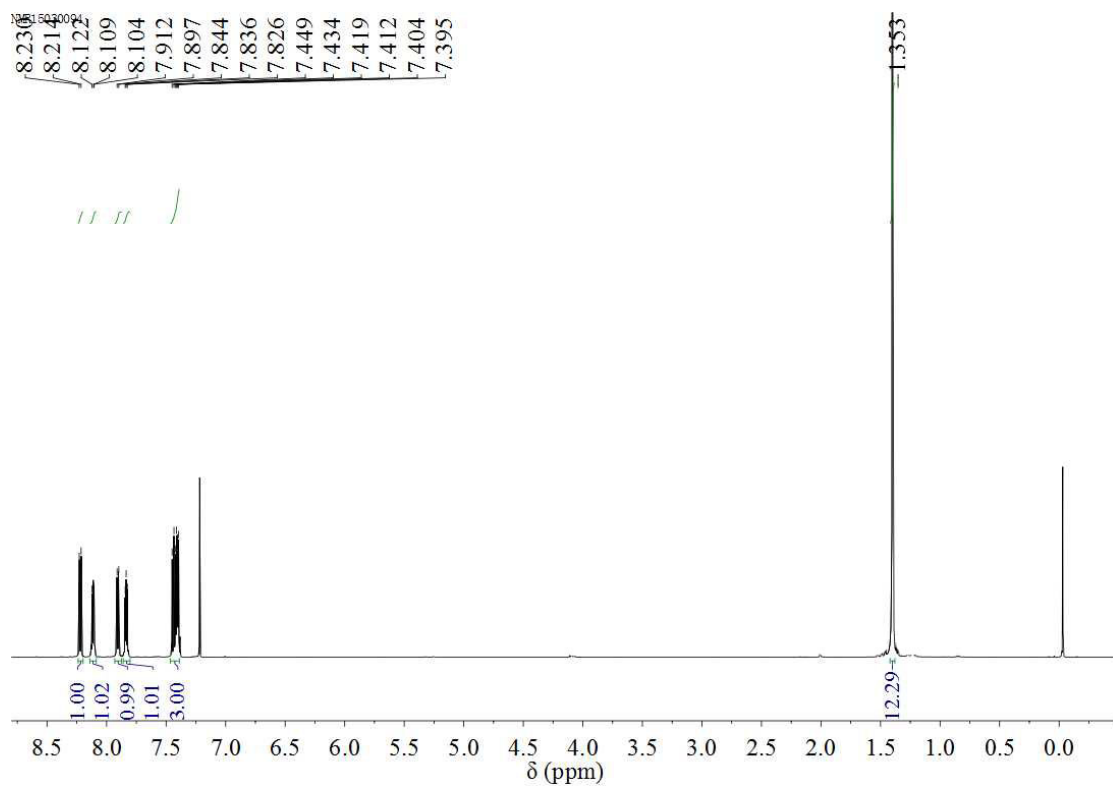

Figure S2. <sup>1</sup>H NMR spectrum of compound **TD4B**.

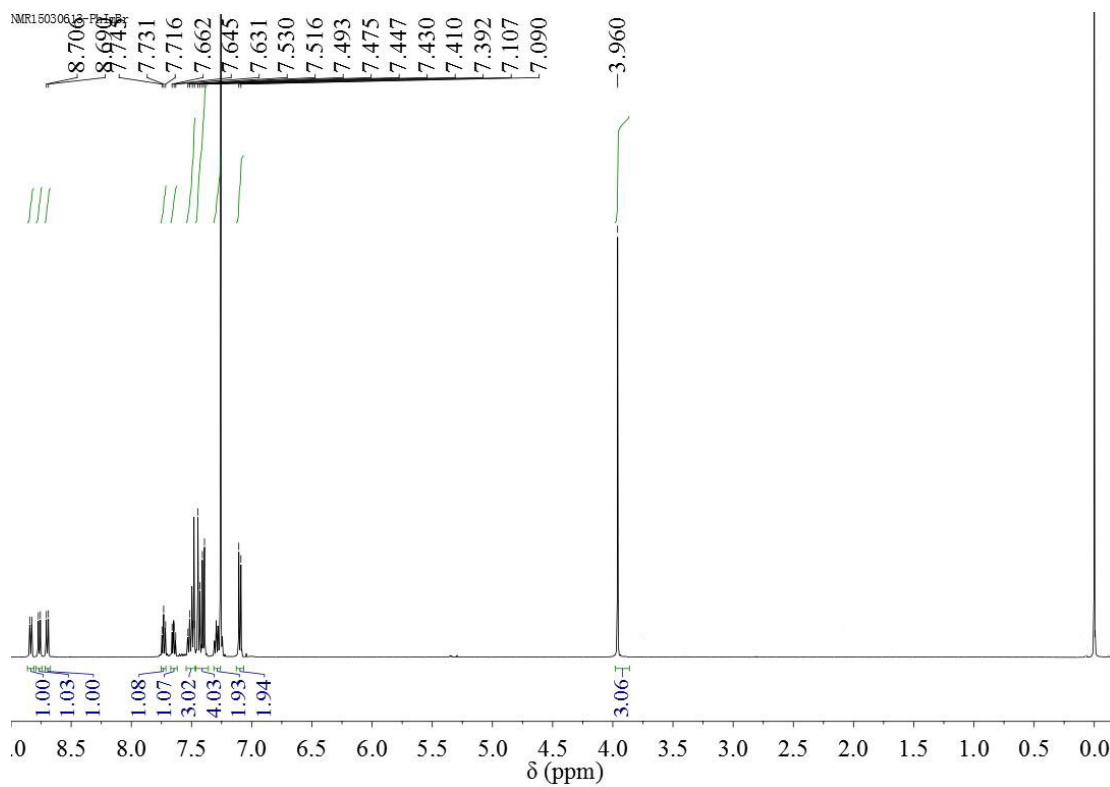

**Figure S3.**  $^1\text{H}$  NMR spectrum of compound **PhImBr**.

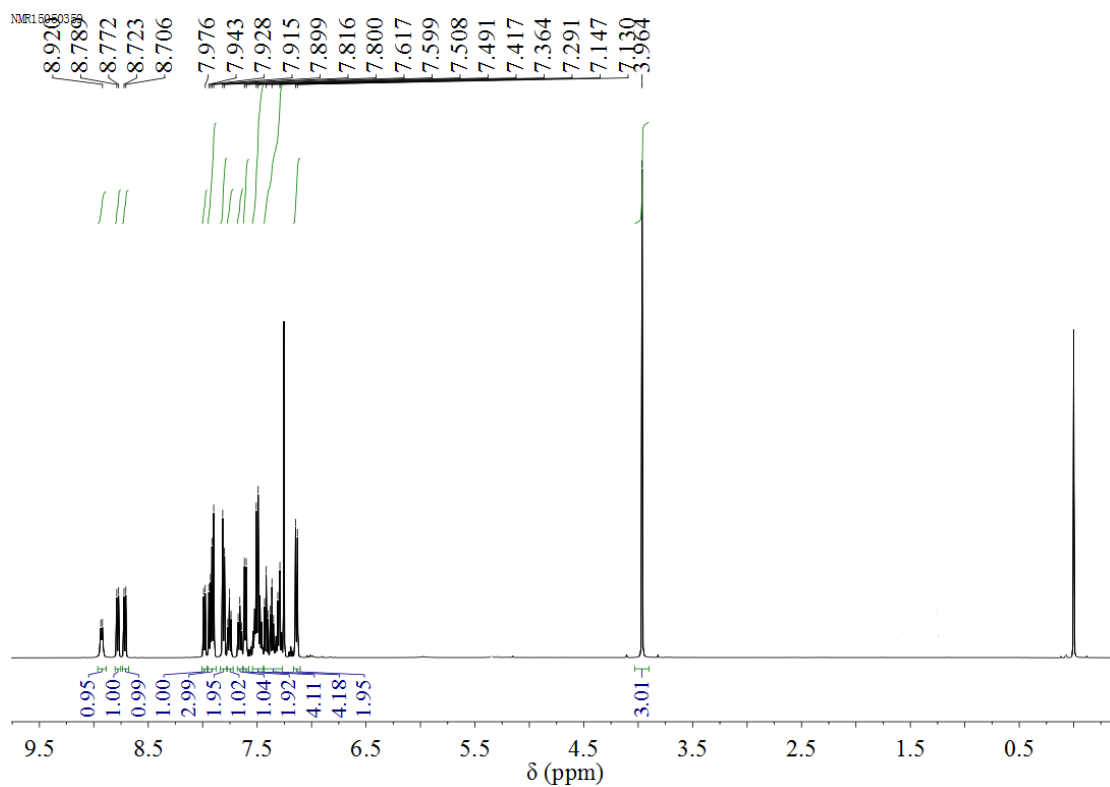

**Figure S4.**  $^1\text{H}$  NMR spectrum of compound **PhImFD**.

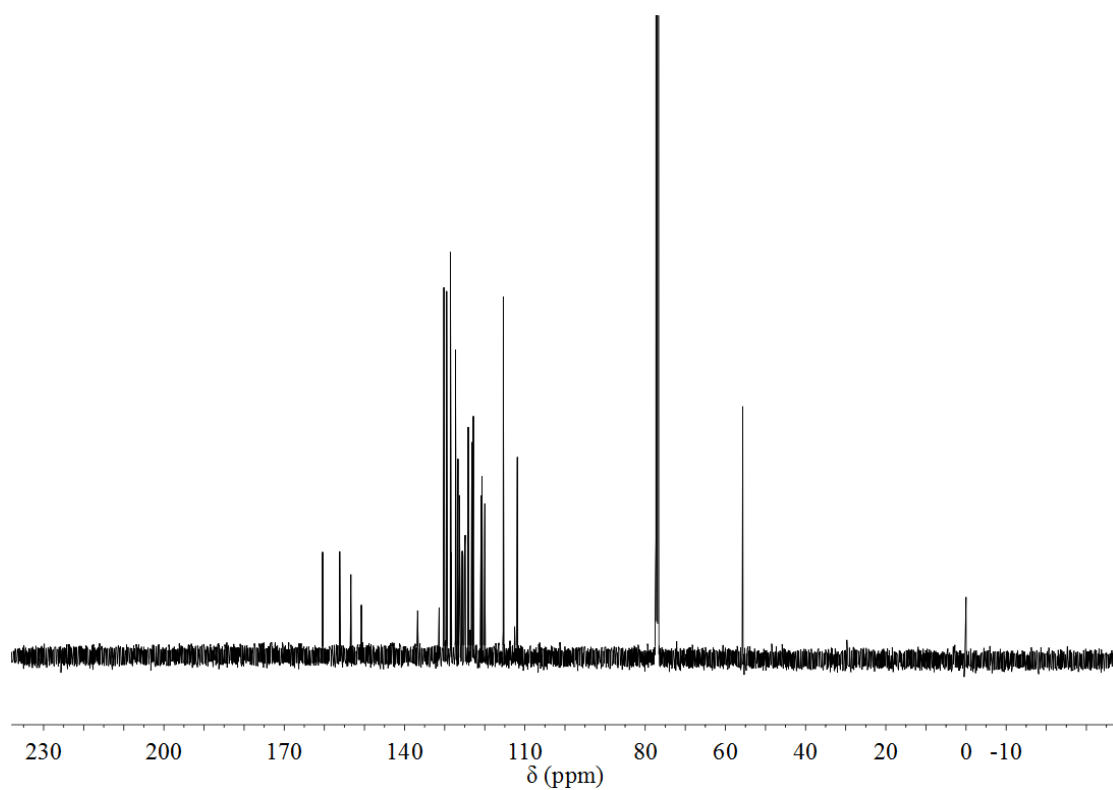

Figure S5. <sup>13</sup>C NMR spectrum of compound PhImFD.

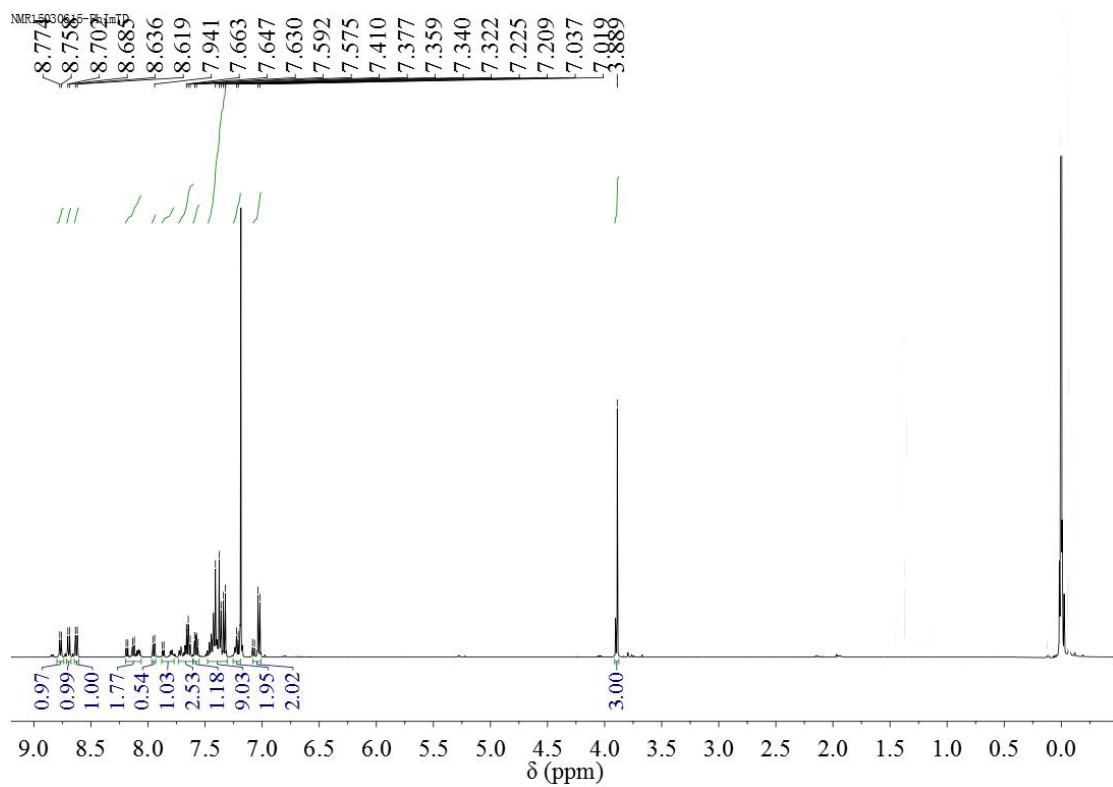

Figure S6. <sup>1</sup>H NMR spectrum of compound PhImTD.

NMR15050556

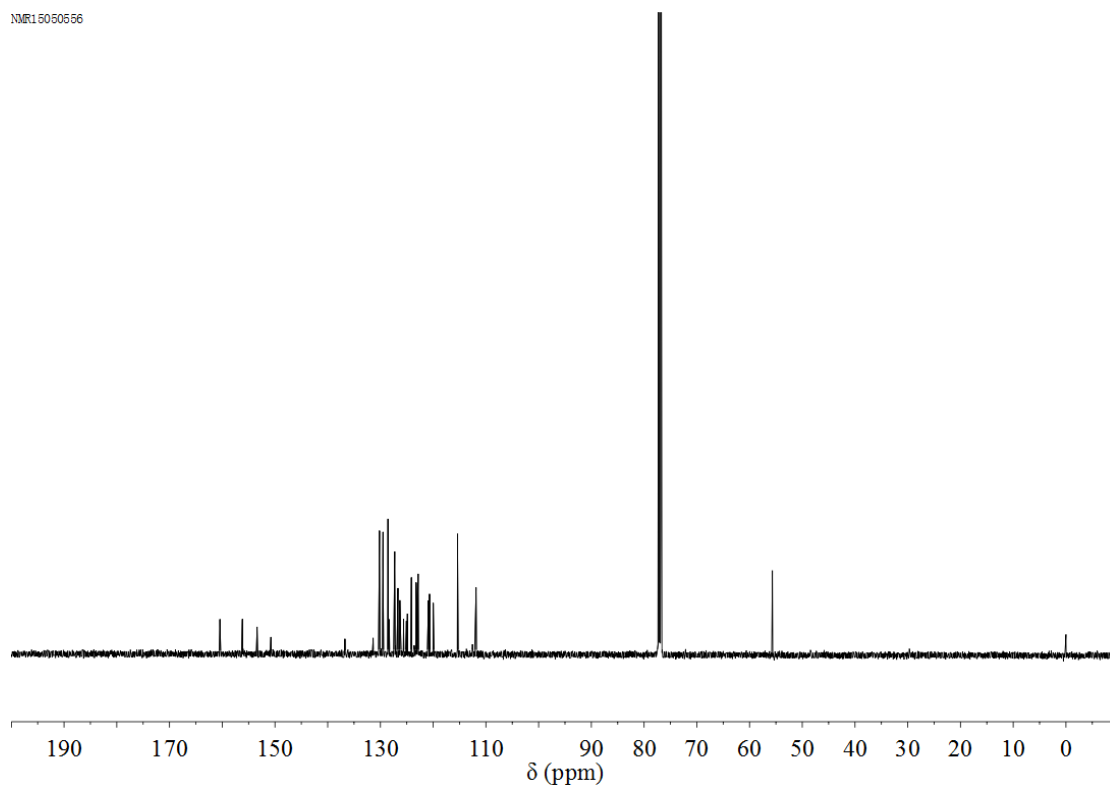

**Figure S7.**  $^{13}\text{C}$  NMR spectrum of compound **PhImTD**.

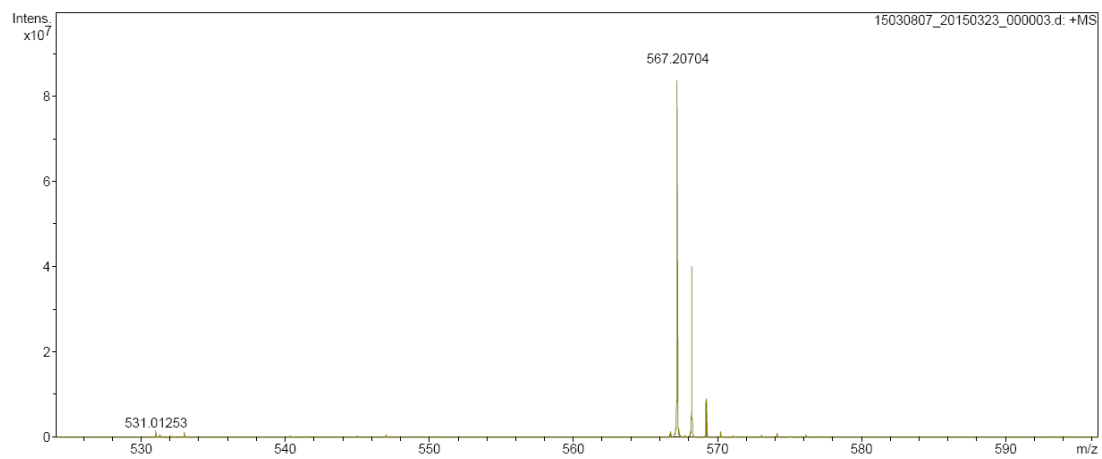

**Figure S8.** HR-MS spectrum of compound **PhImFD**.

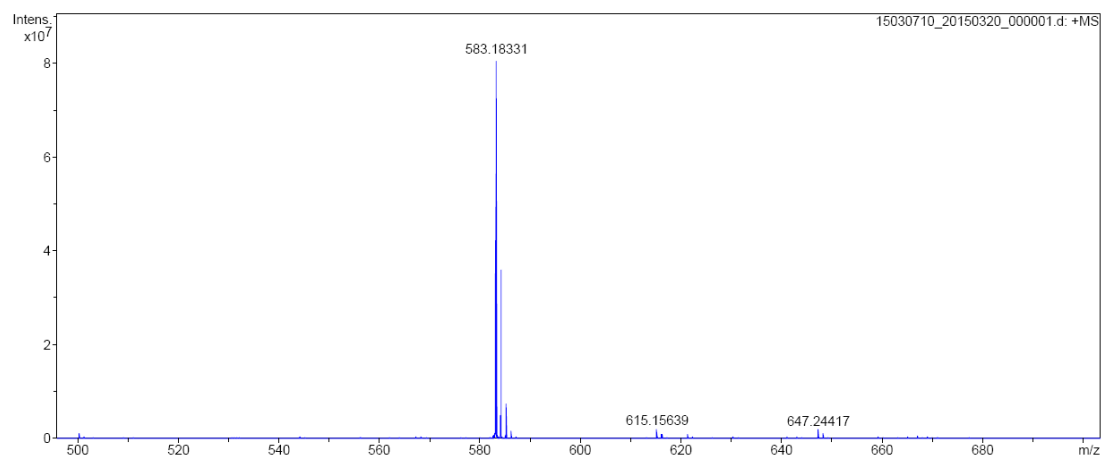

**Figure S9.** HR-MS spectrum of compound **PhImTD**.

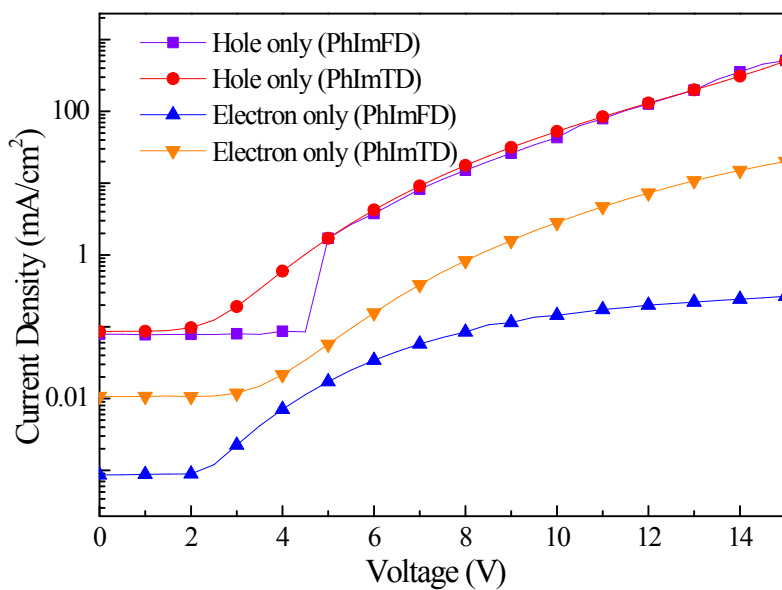

**Figure S10.** Current density of hole-only and electron-only devices.

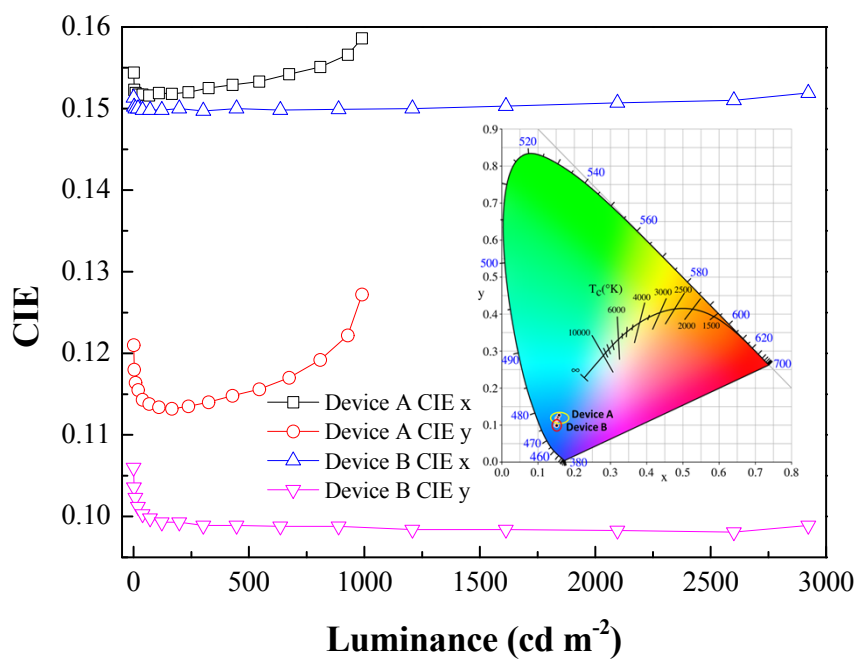

**Figure S11.** CIE coordinates of the devices A and B at different luminance.

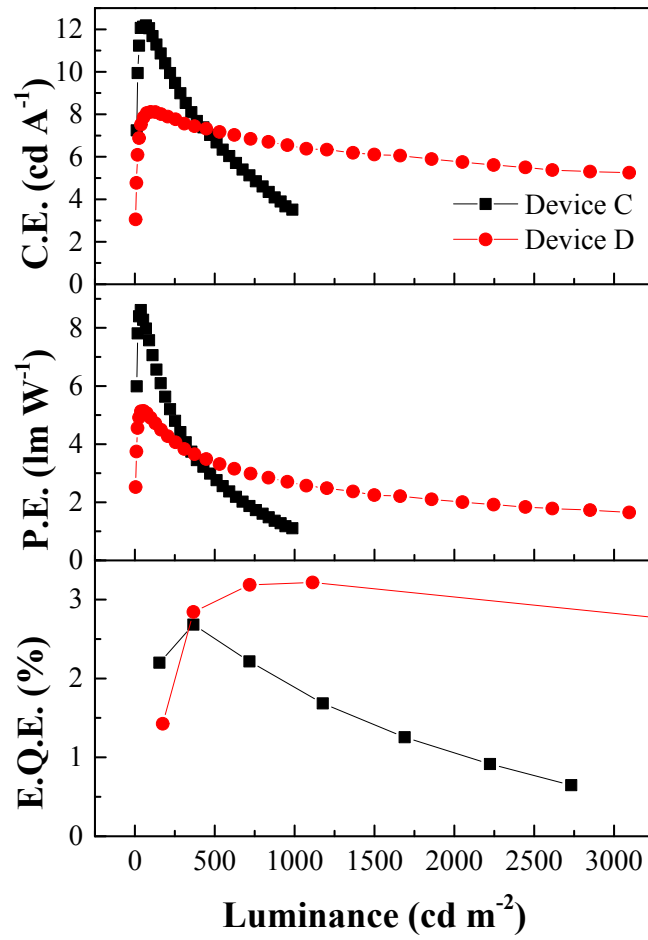

**Figure S12.** Efficiency versus luminance curves of white OLED devices C and D.



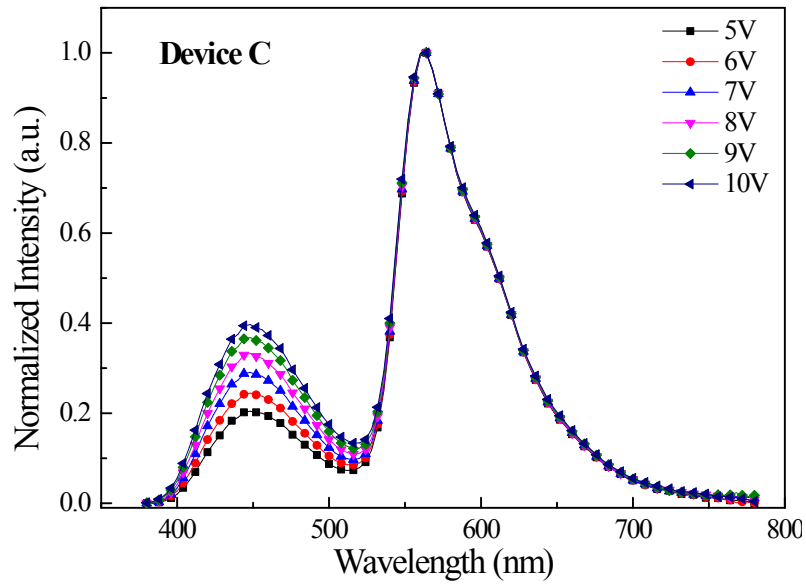

**Figure S13.** Electroluminescence spectra for device C at different voltages.

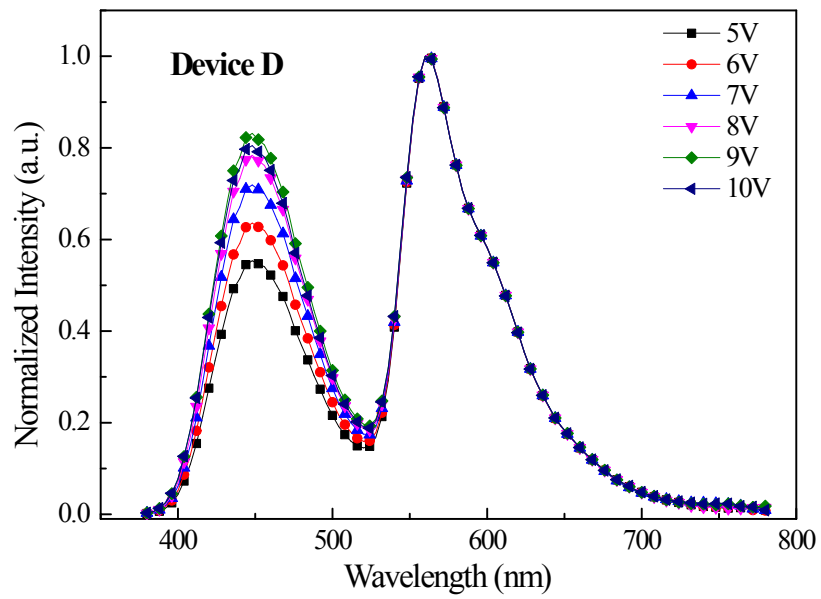

**Figure S14.** Electroluminescence spectra for device D at different voltages.

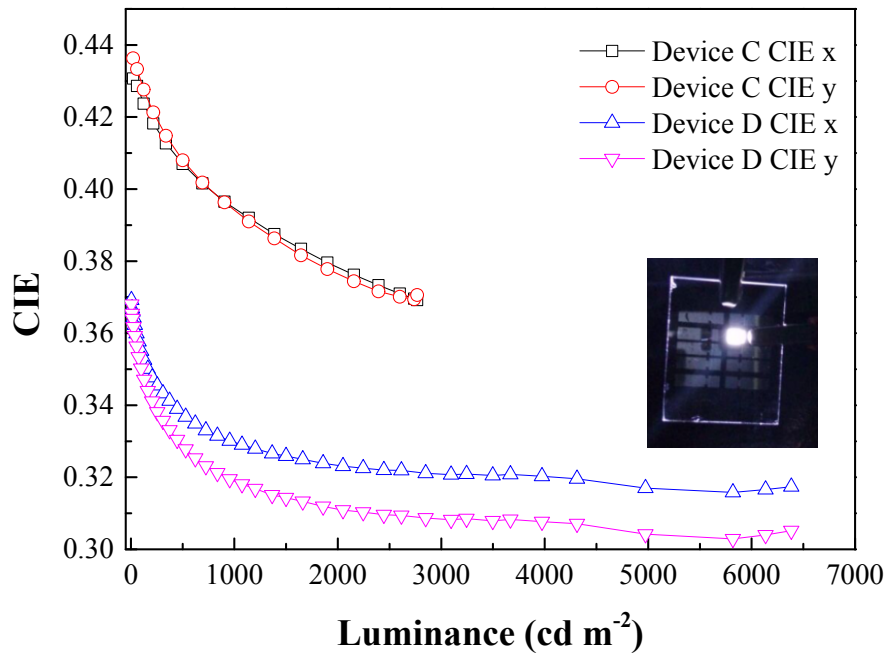

**Figure S15.** CIE coordinates of the devices C and D at different luminance.

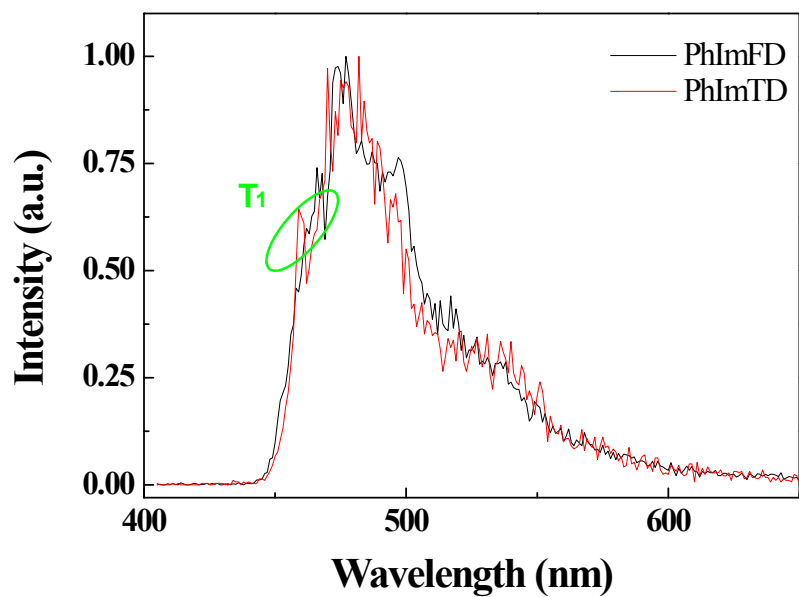

**Figure S16.** Normalized phosphorescent spectra of **PhImFD** and **PhImTD** in the frozen 2-methyltetrahydrofuran matrix at 77 K. Ex = 345 nm.

**Table S1** Key performance parameters of doped WOLED devices C and D.

| Material     | Device | $V_{on}$ (V) <sup>a</sup> | $CE_{max}$ <sup>b</sup> (cd A <sup>-1</sup> ) | $PE_{max}$ <sup>b</sup> (lm W <sup>-1</sup> ) | $EQE_{max}$ <sup>b</sup> (%) | CIE (x, y) <sup>c</sup> |
|--------------|--------|---------------------------|-----------------------------------------------|-----------------------------------------------|------------------------------|-------------------------|
| PhImFD+PO-01 | C      | 3.7                       | 12.18                                         | 8.61                                          | 2.68                         | (0.392, 0.391)          |
| PhImTD+PO-01 | D      | 3.7                       | 8.12                                          | 5.14                                          | 3.22                         | (0.339, 0.330)          |

<sup>a</sup> Voltage required for 1 cd m<sup>-2</sup>;

<sup>b</sup> current efficiency ( $CE_{max}$ ), power efficiency ( $PE_{max}$ ), external quantum yield ( $EQE_{max}$ );

<sup>c</sup> The CIE are measured at 1000 cd m<sup>-2</sup>.
